# Supplementary material for: Volumetric, acoustic, and computational investigation of l-threonine and glycyl-l-threonine interactions in aqueous 1-octyl-3-methylimidazolium bromide solutions
Source: Royal Society of Chemistry journal article supplement (doi:10.1039/d6ra01144f), 2026-06-02
Supplement: d6ra01144f1.pdf [file d6ra01144f1.pdf]

## **Supporting Information**

### **Volumetric, Acoustic, and Computational Investigation of L-Threonine and Glycyl-L-Threonine Interactions in Aqueous 1-Octyl-3-methylimidazolium Bromide Solutions**

**Ravinder Sharma<sup>a</sup>, Sandeep Kumar<sup>b</sup>, Marc Mulamba Tshibangu<sup>b,\*</sup>, Indra Bahadur<sup>c,\*</sup>**

<sup>a</sup>Department of Chemistry, National Institute of Technology, Hamirpur–177005

<sup>b</sup>Department of Chemical Engineering, Mangosuthu University of Technology, Jacobs, Durban 4026, South Africa

<sup>c</sup>Department of Chemistry, North-West University (Mafikeng Campus), Private Bag X2046, Mmabatho 2735, South Africa

\*Corresponding author e-mail: [tshibangu.marc@mut.ac.za](mailto:tshibangu.marc@mut.ac.za); [bahadur.indra@nwu.ac.za](mailto:bahadur.indra@nwu.ac.za)

**Table S1:** Profile of chemicals used in the experiment.

| Chemicals          | CAS No    | Source                                | Molar mass(g·mol <sup>-1</sup> ) | Purity#<br>Mass Fraction | Structure                                                                             |
|--------------------|-----------|---------------------------------------|----------------------------------|--------------------------|---------------------------------------------------------------------------------------|
| L-threonine        | 72-19-5   | Merck,<br>Germany                     | 119.12                           | ≥0.99                    | 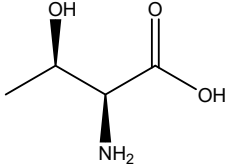   |
| Glycyl-L-threonine | 7093-70-1 | Merck,<br>Germany                     | 176.17                           | ≥0.99                    |    |
| 1-methylimidazole  | 616-47-7  | Merck,<br>Germany                     | 82.10                            | ≥0.99                    |    |
| 1-bromooctane      | 111-83-1  | Sigma-<br>Aldrich,<br>Germany<br>LOBA | 193.12                           | ≥0.99                    |  |
| Acetonitrile       | 75-05-8   | Chemie Pvt.<br>Ltd., Mumbai,<br>India | 41.05                            | ≥0.99                    |  |

|            |            |                    |        |        |                                                                                     |
|------------|------------|--------------------|--------|--------|-------------------------------------------------------------------------------------|
| Hexane     | 110-54-3   | TCI Pvt. Ltd       | 86.18  | ≥0.99  |  |
| [OMim][Br] | 61545-99-1 | Synthesized in lab | 275.23 | ≥0.96* |  |

#as declared by the supplier, \*based on spectroscopic analysis (IR and NMR).

**Table S2** Experimental values of  $\rho$  and  $V_\phi$  for L-threonine and Glycyl-L-threonine in water containing [OMim] [Br] determined at (288.15, 298.15, 308.15, and 318.15) K under a pressure of 0.1 MPa.

| $^a m_A$<br>/(mol·kg <sup>-1</sup> ) | $\rho \times 10^{-3}$ / (kg·m <sup>-3</sup> )       |                       |                       |                       | $V_\phi \times 10^6$ / (m <sup>3</sup> ·mol <sup>-1</sup> ) |              |              |              |
|--------------------------------------|-----------------------------------------------------|-----------------------|-----------------------|-----------------------|-------------------------------------------------------------|--------------|--------------|--------------|
|                                      | $T=288.15$ K                                        | $T=298.15$ K          | $T=308.15$ K          | $T=318.15$ K          | $T=288.15$ K                                                | $T=298.15$ K | $T=308.15$ K | $T=318.15$ K |
|                                      | L-threonine + 0.00 mol·kg <sup>-1</sup> [OMim] [Br] |                       |                       |                       |                                                             |              |              |              |
| 0.00000                              | 0.999130 <sup>a</sup>                               | 0.997050 <sup>a</sup> | 0.994040 <sup>a</sup> | 0.990220 <sup>a</sup> |                                                             |              |              |              |
| 0.09947                              | 1.003258                                            | 1.001178              | 0.998168              | 0.994348              | 77.33                                                       | 77.41        | 77.51        | 77.65        |
| 0.11043                              | 1.003713                                            | 1.001633              | 0.998623              | 0.994803              | 77.30                                                       | 77.37        | 77.48        | 77.61        |
| 0.20746                              | 1.007740                                            | 1.005660              | 1.002650              | 0.998830              | 76.99                                                       | 77.06        | 77.17        | 77.30        |
| 0.30817                              | 1.011919                                            | 1.009839              | 1.006829              | 1.003009              | 76.67                                                       | 76.74        | 76.85        | 76.98        |
| 0.39894                              | 1.015686                                            | 1.013606              | 1.010596              | 1.006776              | 76.39                                                       | 76.46        | 76.56        | 76.69        |
| 0.49718                              | 1.019763                                            | 1.017683              | 1.014673              | 1.010853              | 76.08                                                       | 76.15        | 76.25        | 76.38        |
| 0.60278                              | 1.024145                                            | 1.022065              | 1.019055              | 1.015235              | 75.75                                                       | 75.82        | 75.92        | 76.05        |
| 0.69235                              | 1.027863                                            | 1.025783              | 1.022773              | 1.018953              | 75.48                                                       | 75.55        | 75.65        | 75.77        |

|                                                     |                       |                       |                       |                       |       |       |       |       |
|-----------------------------------------------------|-----------------------|-----------------------|-----------------------|-----------------------|-------|-------|-------|-------|
| 0.80693                                             | 1.032618              | 1.030538              | 1.027528              | 1.023708              | 75.13 | 75.20 | 75.30 | 75.42 |
| 0.98174                                             | 1.039872              | 1.037792              | 1.034782              | 1.030962              | 74.61 | 74.68 | 74.77 | 74.89 |
| L-threonine + 0.10 mol·kg <sup>-1</sup> [OMim] [Br] |                       |                       |                       |                       |       |       |       |       |
| 0.00000                                             | 1.004330 <sup>a</sup> | 1.001550 <sup>a</sup> | 0.997980 <sup>a</sup> | 0.993620 <sup>a</sup> |       |       |       |       |
| 0.10861                                             | 1.008783              | 1.006003              | 1.002433              | 0.998073              | 77.62 | 77.72 | 77.85 | 78.01 |
| 0.19873                                             | 1.012478              | 1.009698              | 1.006128              | 1.001768              | 77.33 | 77.43 | 77.56 | 77.72 |
| 0.30237                                             | 1.016727              | 1.013947              | 1.010377              | 1.006017              | 77.01 | 77.11 | 77.24 | 77.39 |
| 0.41892                                             | 1.021506              | 1.018726              | 1.015156              | 1.010796              | 76.65 | 76.75 | 76.87 | 77.03 |
| 0.50745                                             | 1.025135              | 1.022355              | 1.018785              | 1.014425              | 76.38 | 76.47 | 76.60 | 76.75 |
| 0.61858                                             | 1.029692              | 1.026912              | 1.023342              | 1.018982              | 76.04 | 76.13 | 76.26 | 76.41 |
| 0.70929                                             | 1.033411              | 1.030631              | 1.027061              | 1.022701              | 75.77 | 75.86 | 75.98 | 76.13 |
| 0.79564                                             | 1.036951              | 1.034171              | 1.030601              | 1.026241              | 75.51 | 75.60 | 75.72 | 75.87 |
| 0.91483                                             | 1.041838              | 1.039058              | 1.035488              | 1.031128              | 75.15 | 75.24 | 75.36 | 75.51 |
| 0.99742                                             | 1.045224              | 1.042444              | 1.038874              | 1.034514              | 74.91 | 75.00 | 75.12 | 75.26 |
| L-threonine + 0.20 mol·kg <sup>-1</sup> [OMim] [Br] |                       |                       |                       |                       |       |       |       |       |
| 0.00000                                             | 1.009530 <sup>a</sup> | 1.006050 <sup>a</sup> | 1.001920 <sup>a</sup> | 0.997020 <sup>a</sup> |       |       |       |       |
| 0.11042                                             | 1.014002              | 1.010522              | 1.006392              | 1.001492              | 77.91 | 78.04 | 78.20 | 78.38 |
| 0.21349                                             | 1.018176              | 1.014696              | 1.010566              | 1.005666              | 77.59 | 77.72 | 77.87 | 78.06 |
| 0.29738                                             | 1.021574              | 1.018094              | 1.013964              | 1.009064              | 77.33 | 77.46 | 77.61 | 77.79 |
| 0.39875                                             | 1.025679              | 1.022199              | 1.018069              | 1.013169              | 77.02 | 77.15 | 77.30 | 77.48 |
| 0.51217                                             | 1.030273              | 1.026793              | 1.022663              | 1.017763              | 76.68 | 76.81 | 76.95 | 77.13 |

|         |          |          |          |          |       |       |       |       |
|---------|----------|----------|----------|----------|-------|-------|-------|-------|
| 0.59893 | 1.033787 | 1.030307 | 1.026177 | 1.021277 | 76.42 | 76.54 | 76.69 | 76.86 |
| 0.71081 | 1.038318 | 1.034838 | 1.030708 | 1.025808 | 76.09 | 76.21 | 76.35 | 76.52 |
| 0.80736 | 1.042228 | 1.038748 | 1.034618 | 1.029718 | 75.80 | 75.92 | 76.06 | 76.23 |
| 0.89872 | 1.045928 | 1.042448 | 1.038318 | 1.033418 | 75.53 | 75.65 | 75.79 | 75.96 |
| 0.98724 | 1.049513 | 1.046033 | 1.041903 | 1.037003 | 75.28 | 75.39 | 75.53 | 75.70 |

L-threonine + 0.30 mol·kg<sup>-1</sup> [OMim] [Br]

|         |                       |                      |                       |                       |       |       |       |       |
|---------|-----------------------|----------------------|-----------------------|-----------------------|-------|-------|-------|-------|
| 0.00000 | 1.014730 <sup>a</sup> | 1.01055 <sup>a</sup> | 1.005860 <sup>a</sup> | 1.000420 <sup>a</sup> |       |       |       |       |
| 0.10847 | 1.019069              | 1.01489              | 1.010416              | 1.004737              | 78.21 | 78.37 | 78.63 | 78.96 |
| 0.19879 | 1.022682              | 1.01850              | 1.014209              | 1.008332              | 77.93 | 78.09 | 78.33 | 78.68 |
| 0.30523 | 1.026939              | 1.02276              | 1.018680              | 1.012568              | 77.61 | 77.77 | 77.99 | 78.35 |
| 0.39638 | 1.030585              | 1.02641              | 1.022508              | 1.016196              | 77.34 | 77.49 | 77.70 | 78.07 |
| 0.49891 | 1.034686              | 1.03051              | 1.026814              | 1.020277              | 77.03 | 77.18 | 77.37 | 77.76 |
| 0.61325 | 1.039260              | 1.03508              | 1.031617              | 1.024827              | 76.69 | 76.84 | 77.01 | 77.41 |
| 0.70566 | 1.042956              | 1.03878              | 1.035498              | 1.028505              | 76.42 | 76.57 | 76.72 | 77.14 |
| 0.79943 | 1.046707              | 1.04253              | 1.039436              | 1.032237              | 76.14 | 76.29 | 76.43 | 76.86 |
| 0.89184 | 1.050404              | 1.04622              | 1.043317              | 1.035915              | 75.88 | 76.02 | 76.15 | 76.59 |
| 0.99157 | 1.054393              | 1.05021              | 1.047506              | 1.039884              | 75.59 | 75.73 | 75.84 | 76.29 |

L-threonine + 0.40 mol·kg<sup>-1</sup> [OMim] [Br]

|         |                       |                       |                       |                       |       |       |       |       |
|---------|-----------------------|-----------------------|-----------------------|-----------------------|-------|-------|-------|-------|
| 0.00000 | 1.019930 <sup>a</sup> | 1.015050 <sup>a</sup> | 1.009800 <sup>a</sup> | 1.003820 <sup>a</sup> |       |       |       |       |
| 0.10215 | 1.023965              | 1.019085              | 1.014172              | 1.007855              | 78.51 | 78.70 | 79.02 | 79.15 |
| 0.21687 | 1.028496              | 1.023616              | 1.019082              | 1.012386              | 78.16 | 78.36 | 78.64 | 78.79 |

|         |          |          |          |          |       |       |       |       |
|---------|----------|----------|----------|----------|-------|-------|-------|-------|
| 0.30721 | 1.032065 | 1.027185 | 1.022949 | 1.015955 | 77.89 | 78.08 | 78.34 | 78.52 |
| 0.41098 | 1.036164 | 1.031284 | 1.027390 | 1.020054 | 77.59 | 77.77 | 78.00 | 78.20 |
| 0.50765 | 1.039982 | 1.035102 | 1.031527 | 1.023872 | 77.30 | 77.49 | 77.69 | 77.91 |
| 0.61438 | 1.044198 | 1.039318 | 1.036095 | 1.028088 | 76.99 | 77.17 | 77.35 | 77.59 |
| 0.71479 | 1.048164 | 1.043284 | 1.040393 | 1.032054 | 76.70 | 76.88 | 77.03 | 77.29 |
| 0.81053 | 1.051946 | 1.047066 | 1.044491 | 1.035836 | 76.42 | 76.60 | 76.73 | 77.01 |
| 0.89732 | 1.055374 | 1.050494 | 1.048205 | 1.039264 | 76.17 | 76.35 | 76.45 | 76.76 |
| 0.99084 | 1.059068 | 1.054188 | 1.052208 | 1.042958 | 75.91 | 76.08 | 76.16 | 76.48 |

Glycyl-L-threonine + 0.00 mol·kg<sup>-1</sup> [OMim] [Br]

|         |          |          |          |          |        |        |        |        |
|---------|----------|----------|----------|----------|--------|--------|--------|--------|
| 0.00000 | 0.999130 | 0.997050 | 0.994040 | 0.990220 |        |        |        |        |
| 0.01042 | 0.999839 | 0.997753 | 0.994740 | 0.990918 | 108.13 | 108.71 | 109.14 | 109.50 |
| 0.02015 | 1.000500 | 0.998410 | 0.995394 | 0.991570 | 108.06 | 108.64 | 109.07 | 109.43 |
| 0.02997 | 1.001168 | 0.999073 | 0.996054 | 0.992228 | 107.98 | 108.57 | 109.00 | 109.36 |
| 0.04069 | 1.001897 | 0.999797 | 0.996774 | 0.992946 | 107.91 | 108.49 | 108.92 | 109.28 |
| 0.04984 | 1.002519 | 1.000414 | 0.997389 | 0.993559 | 107.84 | 108.43 | 108.85 | 109.21 |
| 0.05981 | 1.003197 | 1.001087 | 0.998059 | 0.994227 | 107.77 | 108.35 | 108.78 | 109.14 |
| 0.07034 | 1.003913 | 1.001798 | 0.998767 | 0.994933 | 107.69 | 108.28 | 108.70 | 109.06 |
| 0.08079 | 1.004624 | 1.002503 | 0.999469 | 0.995633 | 107.61 | 108.20 | 108.62 | 108.98 |
| 0.08987 | 1.005241 | 1.003116 | 1.000079 | 0.996241 | 107.55 | 108.13 | 108.56 | 108.92 |
| 0.09843 | 1.005823 | 1.003694 | 1.000654 | 0.996815 | 107.48 | 108.07 | 108.50 | 108.85 |

Glycyl-L-threonine + 0.10 mol·kg<sup>-1</sup> [OMim] [Br]

|         |          |          |          |          |        |        |        |        |
|---------|----------|----------|----------|----------|--------|--------|--------|--------|
| 0.00000 | 1.004330 | 1.001550 | 0.997980 | 0.993620 |        |        |        |        |
| 0.01085 | 1.005063 | 1.002279 | 0.998706 | 0.994344 | 108.31 | 108.83 | 109.28 | 109.66 |
| 0.02037 | 1.005707 | 1.002919 | 0.999343 | 0.994979 | 108.24 | 108.76 | 109.21 | 109.59 |
| 0.03116 | 1.006436 | 1.003644 | 1.000065 | 0.995698 | 108.17 | 108.68 | 109.13 | 109.51 |
| 0.04025 | 1.007051 | 1.004255 | 1.000673 | 0.996305 | 108.10 | 108.61 | 109.06 | 109.45 |
| 0.04938 | 1.007668 | 1.004868 | 1.001284 | 0.996914 | 108.03 | 108.55 | 108.99 | 109.38 |
| 0.06013 | 1.008395 | 1.005591 | 1.002003 | 0.997631 | 107.96 | 108.47 | 108.92 | 109.30 |
| 0.06908 | 1.009000 | 1.006192 | 1.002601 | 0.998228 | 107.89 | 108.40 | 108.85 | 109.24 |
| 0.08143 | 1.009835 | 1.007022 | 1.003428 | 0.999051 | 107.80 | 108.31 | 108.76 | 109.15 |
| 0.09071 | 1.010462 | 1.007646 | 1.004048 | 0.999670 | 107.73 | 108.25 | 108.69 | 109.08 |
| 0.10726 | 1.011581 | 1.008758 | 1.005156 | 1.000774 | 107.62 | 108.13 | 108.57 | 108.96 |

Glycyl-L-threonine + 0.20 mol·kg<sup>-1</sup> [OMim][Br]

|         |          |          |          |          |        |        |        |        |
|---------|----------|----------|----------|----------|--------|--------|--------|--------|
| 0.00000 | 1.009530 | 1.006050 | 1.001920 | 0.997020 |        |        |        |        |
| 0.01034 | 1.010225 | 1.006742 | 1.002609 | 0.997707 | 108.50 | 108.94 | 109.41 | 109.82 |
| 0.02061 | 1.010915 | 1.007429 | 1.003293 | 0.998389 | 108.42 | 108.86 | 109.34 | 109.75 |
| 0.02978 | 1.011531 | 1.008042 | 1.003903 | 0.998997 | 108.35 | 108.80 | 109.27 | 109.68 |
| 0.04034 | 1.012241 | 1.008749 | 1.004607 | 0.999699 | 108.28 | 108.72 | 109.19 | 109.60 |
| 0.04937 | 1.012848 | 1.009353 | 1.005208 | 1.000298 | 108.21 | 108.66 | 109.13 | 109.54 |
| 0.06039 | 1.013588 | 1.010090 | 1.005942 | 1.001030 | 108.14 | 108.58 | 109.05 | 109.46 |
| 0.07142 | 1.014329 | 1.010828 | 1.006677 | 1.001762 | 108.06 | 108.50 | 108.97 | 109.38 |
| 0.08072 | 1.014954 | 1.011450 | 1.007296 | 1.002380 | 107.99 | 108.43 | 108.90 | 109.31 |

|                                                            |          |          |          |          |        |        |        |        |
|------------------------------------------------------------|----------|----------|----------|----------|--------|--------|--------|--------|
| 0.08976                                                    | 1.015562 | 1.012055 | 1.007898 | 1.002980 | 107.92 | 108.37 | 108.84 | 109.25 |
| 0.09971                                                    | 1.016231 | 1.012721 | 1.008561 | 1.003641 | 107.85 | 108.29 | 108.77 | 109.17 |
| Glycyl-L-threonine + 0.30 mol·kg <sup>-1</sup> [OMim] [Br] |          |          |          |          |        |        |        |        |
| 0.00000                                                    | 1.014730 | 1.010550 | 1.005860 | 1.000420 |        |        |        |        |
| 0.01135                                                    | 1.015488 | 1.011306 | 1.006613 | 1.001170 | 108.66 | 109.03 | 109.53 | 109.97 |
| 0.01989                                                    | 1.016059 | 1.011875 | 1.007179 | 1.001735 | 108.60 | 108.97 | 109.47 | 109.91 |
| 0.02976                                                    | 1.016718 | 1.012532 | 1.007833 | 1.002387 | 108.53 | 108.90 | 109.40 | 109.84 |
| 0.04015                                                    | 1.017412 | 1.013224 | 1.008522 | 1.003074 | 108.45 | 108.83 | 109.32 | 109.76 |
| 0.05031                                                    | 1.018091 | 1.013901 | 1.009196 | 1.003745 | 108.38 | 108.75 | 109.25 | 109.69 |
| 0.06173                                                    | 1.018854 | 1.014661 | 1.009953 | 1.004500 | 108.30 | 108.67 | 109.17 | 109.60 |
| 0.07124                                                    | 1.019489 | 1.015295 | 1.010583 | 1.005129 | 108.23 | 108.60 | 109.10 | 109.54 |
| 0.08019                                                    | 1.020087 | 1.015891 | 1.011177 | 1.005721 | 108.17 | 108.54 | 109.04 | 109.47 |
| 0.09375                                                    | 1.020993 | 1.016794 | 1.012076 | 1.006617 | 108.07 | 108.44 | 108.94 | 109.37 |
| 0.09921                                                    | 1.021357 | 1.017157 | 1.012438 | 1.006978 | 108.03 | 108.41 | 108.90 | 109.33 |
| Glycyl-L-threonine + 0.40 mol·kg <sup>-1</sup> [OMim] [Br] |          |          |          |          |        |        |        |        |
| 0.00000                                                    | 1.019930 | 1.015050 | 1.009800 | 1.003820 |        |        |        |        |
| 0.01147                                                    | 1.020692 | 1.015809 | 1.010557 | 1.004575 | 108.82 | 109.22 | 109.65 | 110.12 |
| 0.02058                                                    | 1.021297 | 1.016412 | 1.011158 | 1.005174 | 108.75 | 109.16 | 109.59 | 110.05 |
| 0.02935                                                    | 1.021879 | 1.016993 | 1.011737 | 1.005751 | 108.69 | 109.10 | 109.53 | 109.99 |
| 0.03981                                                    | 1.022573 | 1.017685 | 1.012427 | 1.006439 | 108.62 | 109.02 | 109.45 | 109.91 |
| 0.05125                                                    | 1.023333 | 1.018443 | 1.013183 | 1.007192 | 108.54 | 108.94 | 109.37 | 109.83 |

|         |          |          |          |          |        |        |        |        |
|---------|----------|----------|----------|----------|--------|--------|--------|--------|
| 0.06084 | 1.023970 | 1.019078 | 1.013815 | 1.007823 | 108.47 | 108.87 | 109.30 | 109.76 |
| 0.06921 | 1.024526 | 1.019632 | 1.014368 | 1.008374 | 108.41 | 108.82 | 109.24 | 109.70 |
| 0.08037 | 1.025267 | 1.020370 | 1.015104 | 1.009108 | 108.33 | 108.74 | 109.16 | 109.62 |
| 0.09034 | 1.025929 | 1.021031 | 1.015762 | 1.009764 | 108.26 | 108.67 | 109.09 | 109.55 |
| 0.10275 | 1.026753 | 1.021852 | 1.016582 | 1.010581 | 108.17 | 108.58 | 109.00 | 109.46 |

<sup>a</sup> $m_A$  is the molality of amino acids/ dipeptides in aqueous solutions of 1-octyl-3-methylimidazolium bromide. <sup>a</sup> represents a reference (53) from where density values have been taken. Standard uncertainties  $u$  obtained are  $u(\rho) = 5 \times 10^{-3} \text{ kg}\cdot\text{m}^{-3}$ ;  $u(m) = 2 \times 10^{-5} \text{ mol}\cdot\text{kg}^{-1}$ ;  $u(T) = 0.001 \text{ K}$  and  $u(p) = 0.01 \text{ MPa}$ .

**Table S3** Measurements of the limiting apparent molar volume ( $V_\phi^0$ ) and experimental slope ( $S_v^*$ ) for L-threonine and Glycyl-L-threonine carried out in aqueous solutions of 1-octyl-3-methylimidazolium bromide across temperatures of 288.15 to 318.15 K at an experimental pressure of ,  $p = 0.1 \text{ MPa}$

| <sup>a</sup> $m_B /$<br>( $\text{mol}\cdot\text{kg}^{-1}$ ) | 288.15 K                                                  | 298.15 K       | 308.15 K       | 318.15 K       |
|-------------------------------------------------------------|-----------------------------------------------------------|----------------|----------------|----------------|
|                                                             | L-threonine                                               |                |                |                |
|                                                             | $V_\phi^0 \times 10^6 / (\text{m}^3\cdot\text{mol}^{-1})$ |                |                |                |
| 0.000                                                       | 77.63(±0.0063)                                            | 77.70(±0.0063) | 77.81(±0.0064) | 77.95(±0.0064) |
| 0.100                                                       | 77.93(±0.0067)                                            | 78.03(±0.0067) | 78.17(±0.0068) | 78.33(±0.0063) |
| 0.200                                                       | 78.23(±0.0062)                                            | 78.36(±0.0063) | 78.52(±0.0063) | 78.71(±0.0064) |

|                                                                          |                 |                 |                 |                 |
|--------------------------------------------------------------------------|-----------------|-----------------|-----------------|-----------------|
| 0.300                                                                    | 78.52(±0.0061)  | 78.68(±0.0062)  | 78.95(±0.0069)  | 79.28(±0.0063)  |
| 0.400                                                                    | 78.80(±0.0060)  | 78.99(±0.0061)  | 79.33(±0.0070)  | 79.44(±0.0062)  |
| $S_V^* \times 10^6 / (\text{m}^3 \cdot \text{kg} \cdot \text{mol}^{-2})$ |                 |                 |                 |                 |
| 0.000                                                                    | -3.09(±0.0115)  | -3.10(±0.0115)  | -3.12(±0.0116)  | -3.13(±0.0117)  |
| 0.100                                                                    | -3.04(±0.0107)  | -3.06(±0.0108)  | -3.07(±0.0109)  | -3.09(±0.0110)  |
| 0.200                                                                    | -3.01(±0.0100)  | -3.02(±0.0101)  | -3.04(±0.0102)  | -3.06(±0.0103)  |
| 0.300                                                                    | -2.97(±0.0099)  | -2.99(±0.0111)  | -3.15(±0.0101)  | -3.02(±0.0102)  |
| 0.400                                                                    | -2.93(±0.0097)  | -2.95(±0.0098)  | -3.21(±0.0116)  | -3.00(±0.0100)  |
| Glycyl-L-threonine                                                       |                 |                 |                 |                 |
| $V_\phi^0 \times 10^6 / (\text{m}^3 \cdot \text{mol}^{-1})$              |                 |                 |                 |                 |
| 0.000                                                                    | 108.20(±0.0002) | 108.79(±0.0002) | 109.22(±0.0002) | 109.58(±0.0002) |
| 0.100                                                                    | 108.39(±0.0003) | 108.90(±0.0003) | 109.35(±0.0003) | 109.74(±0.0003) |
| 0.200                                                                    | 108.57(±0.0002) | 109.01(±0.0002) | 109.49(±0.0002) | 109.90(±0.0002) |
| 0.300                                                                    | 108.74(±0.0002) | 109.11(±0.0002) | 109.61(±0.0002) | 110.05(±0.0002) |
| 0.400                                                                    | 108.90(±0.0002) | 109.31(±0.0002) | 109.73(±0.0002) | 110.20(±0.0002) |

|       | $S_V^* \times 10^6 / (\text{m}^3 \cdot \text{kg} \cdot \text{mol}^{-2})$ |                |                |                |
|-------|--------------------------------------------------------------------------|----------------|----------------|----------------|
| 0.000 | -7.31(±0.0042)                                                           | -7.31(±0.0042) | -7.33(±0.0042) | -7.36(±0.0042) |
| 0.100 | -7.24(±0.0048)                                                           | -7.25(±0.0047) | -7.27(±0.0048) | -7.31(±0.0048) |
| 0.200 | -7.17(±0.0042)                                                           | -7.20(±0.0041) | -7.22(±0.0041) | -7.27(±0.0042) |
| 0.300 | -7.11(±0.0040)                                                           | -7.14(±0.0040) | -7.17(±0.0040) | -7.22(±0.0041) |
| 0.400 | -7.04(±0.0041)                                                           | -7.08(±0.0041) | -7.12(±0.0042) | -7.17(±0.0042) |

$^a m_B$  is the molality of aqueous solutions of 1-octyl-3-methylimidazolium bromide.

**Table S4** Partial molar transfer volumes  $\Delta V_\phi^0$  of L-threonine and Glycyl-L- threonine measured in 1-octyl-3-methylimidazolium bromide aqueous solutions at four temperatures (288.15, 298.15, 308.15, and 318.15 K) under constant pressure ( $p = 0.1$  MPa).

| $^a m_B /$<br>(mol·kg <sup>-1</sup> ) | $\Delta V_\phi^0 \times 10^6 / (\text{m}^3 \cdot \text{mol}^{-1})$ |              |              |              |
|---------------------------------------|--------------------------------------------------------------------|--------------|--------------|--------------|
|                                       | $T=288.15$ K                                                       | $T=298.15$ K | $T=308.15$ K | $T=318.15$ K |
|                                       | L-threonine                                                        |              |              |              |
| 0.100                                 | 0.30                                                               | 0.33         | 0.35         | 0.38         |
| 0.200                                 | 0.60                                                               | 0.66         | 0.71         | 0.76         |
| 0.300                                 | 0.89                                                               | 0.98         | 1.14         | 1.33         |

|                    |      |      |      |      |
|--------------------|------|------|------|------|
| 0.400              | 1.17 | 1.29 | 1.52 | 1.49 |
| Glycyl-L-threonine |      |      |      |      |
| 0.100              | 0.19 | 0.11 | 0.14 | 0.16 |
| 0.200              | 0.36 | 0.22 | 0.27 | 0.32 |
| 0.300              | 0.53 | 0.32 | 0.40 | 0.47 |
| 0.400              | 0.69 | 0.52 | 0.52 | 0.62 |

<sup>a</sup> $m_B$  is the molality of aqueous solutions of 1-octyl-3-methylimidazolium bromide.

**Table S5** Measurements of sound velocity ( $u$ ) and apparent molar isentropic compressibility ( $K_{\phi,s}$ ) for L-threonine and Glycyl-L-threonine carried out in aqueous 1-octyl-3-methylimidazolium bromide solutions at 288.15–318.15 K and  $p=0.1$  MPa pressure.

| <sup>a</sup> $m_A$<br>/(mol·kg <sup>-1</sup> )       | $u$ / (m·s <sup>-1</sup> ) |                      |                      |                      | $K_{\phi,s} \times 10^{-6}$ / (m <sup>3</sup> ·mol <sup>-1</sup> ·GPa <sup>-1</sup> ) |              |              |              |
|------------------------------------------------------|----------------------------|----------------------|----------------------|----------------------|---------------------------------------------------------------------------------------|--------------|--------------|--------------|
|                                                      | $T=288.15$ K               | $T=298.15$ K         | $T=308.15$ K         | $T=318.15$ K         | $T=288.15$ K                                                                          | $T=298.15$ K | $T=308.15$ K | $T=318.15$ K |
| L-threonine + 0.000 mol·kg <sup>-1</sup> [OMim] [Br] |                            |                      |                      |                      |                                                                                       |              |              |              |
| 0.00000                                              | 1466.53 <sup>a</sup>       | 1495.78 <sup>a</sup> | 1519.35 <sup>a</sup> | 1535.94 <sup>a</sup> |                                                                                       |              |              |              |
| 0.09947                                              | 1475.09                    | 1503.34              | 1526.62              | 1543.31              | -37.8033                                                                              | -29.6141     | -26.5900     | -26.4704     |
| 0.11043                                              | 1476.03                    | 1504.18              | 1527.42              | 1544.12              | -37.7958                                                                              | -29.6165     | -26.5952     | -26.4752     |
| 0.20746                                              | 1484.38                    | 1511.56              | 1534.50              | 1551.30              | -37.7274                                                                              | -29.6357     | -26.6389     | -26.5157     |

|         |         |         |         |         |          |          |          |          |
|---------|---------|---------|---------|---------|----------|----------|----------|----------|
| 0.30817 | 1493.05 | 1519.22 | 1541.86 | 1558.76 | -37.6526 | -29.6509 | -26.6795 | -26.5531 |
| 0.39894 | 1500.86 | 1526.12 | 1548.49 | 1565.48 | -37.5821 | -29.6607 | -26.7121 | -26.5828 |
| 0.49718 | 1509.31 | 1533.59 | 1555.67 | 1572.76 | -37.5026 | -29.6673 | -26.7432 | -26.6110 |
| 0.60278 | 1518.40 | 1541.62 | 1563.38 | 1580.58 | -37.4137 | -29.6700 | -26.7721 | -26.6368 |
| 0.69235 | 1526.11 | 1548.43 | 1569.93 | 1587.21 | -37.3357 | -29.6688 | -26.7929 | -26.6551 |
| 0.80693 | 1535.97 | 1557.15 | 1578.30 | 1595.69 | -37.2324 | -29.6628 | -26.8150 | -26.6740 |
| 0.98174 | 1551.01 | 1570.44 | 1591.07 | 1608.64 | -37.0682 | -29.6444 | -26.8391 | -26.6934 |

L-threonine + 0.100 mol·kg<sup>-1</sup> [OMim] [Br]

|         |                      |                      |                      |                      |          |          |          |          |
|---------|----------------------|----------------------|----------------------|----------------------|----------|----------|----------|----------|
| 0.00000 | 1480.26 <sup>a</sup> | 1508.28 <sup>a</sup> | 1531.00 <sup>a</sup> | 1546.59 <sup>a</sup> |          |          |          |          |
| 0.10861 | 1488.41              | 1516.43              | 1539.15              | 1554.74              | -28.9309 | -27.3042 | -26.1892 | -25.6273 |
| 0.19873 | 1495.16              | 1523.18              | 1545.90              | 1561.49              | -28.9575 | -27.3373 | -26.2267 | -25.6671 |
| 0.30237 | 1502.94              | 1530.96              | 1553.68              | 1569.27              | -28.9833 | -27.3707 | -26.2652 | -25.7082 |
| 0.41892 | 1511.68              | 1539.70              | 1562.42              | 1578.01              | -29.0064 | -27.4025 | -26.3027 | -25.7487 |
| 0.50745 | 1518.32              | 1546.34              | 1569.06              | 1584.65              | -29.0199 | -27.4227 | -26.3273 | -25.7755 |
| 0.61858 | 1526.65              | 1554.67              | 1577.39              | 1592.98              | -29.0323 | -27.4434 | -26.3536 | -25.8047 |
| 0.70929 | 1533.46              | 1561.48              | 1584.20              | 1599.79              | -29.0387 | -27.4566 | -26.3714 | -25.8249 |
| 0.79564 | 1539.93              | 1567.95              | 1590.67              | 1606.26              | -29.0417 | -27.4663 | -26.3855 | -25.8413 |
| 0.91483 | 1548.87              | 1576.89              | 1599.61              | 1615.20              | -29.0413 | -27.4750 | -26.4003 | -25.8593 |
| 0.99742 | 1555.07              | 1583.09              | 1605.81              | 1621.40              | -29.0380 | -27.4781 | -26.4077 | -25.8688 |

L-threonine + 0.200 mol·kg<sup>-1</sup> [OMim] [Br]

|         |                      |                      |                      |                      |  |  |  |  |
|---------|----------------------|----------------------|----------------------|----------------------|--|--|--|--|
| 0.00000 | 1493.99 <sup>a</sup> | 1520.78 <sup>a</sup> | 1542.65 <sup>a</sup> | 1557.24 <sup>a</sup> |  |  |  |  |
|---------|----------------------|----------------------|----------------------|----------------------|--|--|--|--|

|         |         |         |         |         |          |          |          |          |
|---------|---------|---------|---------|---------|----------|----------|----------|----------|
| 0.11042 | 1502.27 | 1529.06 | 1550.93 | 1565.52 | -27.0927 | -25.6986 | -24.7405 | -24.3079 |
| 0.21349 | 1510.00 | 1536.79 | 1558.66 | 1573.25 | -27.1331 | -25.7451 | -24.7911 | -24.3605 |
| 0.29738 | 1516.29 | 1543.08 | 1564.95 | 1579.54 | -27.1622 | -25.7794 | -24.8287 | -24.3997 |
| 0.39875 | 1523.90 | 1550.69 | 1572.56 | 1587.15 | -27.1932 | -25.8165 | -24.8700 | -24.4430 |
| 0.51217 | 1532.40 | 1559.19 | 1581.06 | 1595.65 | -27.2226 | -25.8528 | -24.9110 | -24.4863 |
| 0.59893 | 1538.91 | 1565.70 | 1587.57 | 1602.16 | -27.2413 | -25.8770 | -24.9388 | -24.5158 |
| 0.71081 | 1547.30 | 1574.09 | 1595.96 | 1610.55 | -27.2611 | -25.9037 | -24.9702 | -24.5495 |
| 0.80736 | 1554.54 | 1581.33 | 1603.20 | 1617.79 | -27.2742 | -25.9229 | -24.9935 | -24.5747 |
| 0.89872 | 1561.39 | 1588.18 | 1610.05 | 1624.64 | -27.2834 | -25.9378 | -25.0124 | -24.5955 |
| 0.98724 | 1568.03 | 1594.82 | 1616.69 | 1631.28 | -27.2894 | -25.9495 | -25.0278 | -24.6127 |

L-threonine + 0.300 mol·kg<sup>-1</sup> [OMim] [Br]

|         |                      |                      |                      |                      |          |          |          |          |
|---------|----------------------|----------------------|----------------------|----------------------|----------|----------|----------|----------|
| 0.00000 | 1507.72 <sup>a</sup> | 1533.28 <sup>a</sup> | 1554.30 <sup>a</sup> | 1567.89 <sup>a</sup> |          |          |          |          |
| 0.10847 | 1515.86              | 1541.42              | 1562.44              | 1576.03              | -25.3526 | -24.1692 | -24.9636 | -22.8783 |
| 0.19879 | 1522.63              | 1548.19              | 1569.21              | 1582.80              | -25.3965 | -24.2175 | -25.0003 | -22.9323 |
| 0.30523 | 1530.61              | 1556.17              | 1577.19              | 1590.78              | -25.4434 | -24.2696 | -25.0389 | -22.9911 |
| 0.39638 | 1537.45              | 1563.01              | 1584.03              | 1597.62              | -25.4795 | -24.3102 | -25.0681 | -23.0376 |
| 0.49891 | 1545.14              | 1570.70              | 1591.72              | 1605.31              | -25.5158 | -24.3517 | -25.0969 | -23.0856 |
| 0.61325 | 1553.71              | 1579.27              | 1600.29              | 1613.88              | -25.5512 | -24.3928 | -25.1240 | -23.1341 |
| 0.70566 | 1560.64              | 1586.20              | 1607.22              | 1620.81              | -25.5759 | -24.4223 | -25.1423 | -23.1696 |
| 0.79943 | 1567.68              | 1593.24              | 1614.26              | 1627.85              | -25.5976 | -24.4488 | -25.1577 | -23.2023 |
| 0.89184 | 1574.61              | 1600.17              | 1621.19              | 1634.78              | -25.6158 | -24.4718 | -25.1697 | -23.2313 |

|                                                            |                      |                      |                      |                      |          |          |          |          |
|------------------------------------------------------------|----------------------|----------------------|----------------------|----------------------|----------|----------|----------|----------|
| 0.99157                                                    | 1582.09              | 1607.65              | 1628.67              | 1642.26              | -25.6320 | -24.4932 | -25.1795 | -23.2593 |
| L-threonine + 0.400 mol·kg <sup>-1</sup> [OMim] [Br]       |                      |                      |                      |                      |          |          |          |          |
| 0.00000                                                    | 1521.45 <sup>a</sup> | 1545.78 <sup>a</sup> | 1565.95 <sup>a</sup> | 1578.54 <sup>a</sup> |          |          |          |          |
| 0.10215                                                    | 1529.11              | 1553.44              | 1573.61              | 1586.20              | -23.7036 | -22.7108 | -24.6134 | -21.8177 |
| 0.21687                                                    | 1537.72              | 1562.05              | 1582.22              | 1594.81              | -23.7684 | -22.7801 | -24.6564 | -21.8914 |
| 0.30721                                                    | 1544.49              | 1568.82              | 1588.99              | 1601.58              | -23.8152 | -22.8305 | -24.6862 | -21.9452 |
| 0.41098                                                    | 1552.27              | 1576.60              | 1596.77              | 1609.36              | -23.8645 | -22.8840 | -24.7163 | -22.0027 |
| 0.50765                                                    | 1559.52              | 1583.85              | 1604.02              | 1616.61              | -23.9063 | -22.9297 | -24.7404 | -22.0522 |
| 0.61438                                                    | 1567.53              | 1591.86              | 1612.03              | 1624.62              | -23.9480 | -22.9758 | -24.7628 | -22.1025 |
| 0.71479                                                    | 1575.06              | 1599.39              | 1619.56              | 1632.15              | -23.9831 | -23.0151 | -24.7800 | -22.1457 |
| 0.81053                                                    | 1582.24              | 1606.57              | 1626.74              | 1639.33              | -24.0130 | -23.0490 | -24.7931 | -22.1835 |
| 0.89732                                                    | 1588.75              | 1613.08              | 1633.25              | 1645.84              | -24.0372 | -23.0768 | -24.8023 | -22.2148 |
| 0.99084                                                    | 1595.76              | 1620.09              | 1640.26              | 1652.85              | -24.0603 | -23.1039 | -24.8093 | -22.2456 |
| Glycyl-L-threonine +0.000 mol·kg <sup>-1</sup> [OMim] [Br] |                      |                      |                      |                      |          |          |          |          |
| 0.00000                                                    | 1466.53              | 1495.78              | 1519.35              | 1535.94              |          |          |          |          |
| 0.01042                                                    | 1467.74              | 1496.87              | 1520.37              | 1536.88              | -55.0172 | -44.7964 | -38.6098 | -33.0250 |
| 0.02015                                                    | 1468.87              | 1497.90              | 1521.32              | 1537.75              | -55.0064 | -44.8007 | -38.6219 | -33.0441 |
| 0.02997                                                    | 1470.01              | 1498.93              | 1522.29              | 1538.64              | -54.9953 | -44.8049 | -38.6341 | -33.0631 |
| 0.04069                                                    | 1471.25              | 1500.05              | 1523.34              | 1539.60              | -54.9830 | -44.8093 | -38.6471 | -33.0838 |
| 0.04984                                                    | 1472.31              | 1501.01              | 1524.23              | 1540.43              | -54.9724 | -44.8130 | -38.6581 | -33.1012 |
| 0.05981                                                    | 1473.47              | 1502.06              | 1525.21              | 1541.32              | -54.9607 | -44.8168 | -38.6699 | -33.1201 |

|         |         |         |         |         |          |          |          |          |
|---------|---------|---------|---------|---------|----------|----------|----------|----------|
| 0.07034 | 1474.69 | 1503.17 | 1526.24 | 1542.27 | -54.9482 | -44.8206 | -38.6822 | -33.1398 |
| 0.08079 | 1475.90 | 1504.26 | 1527.27 | 1543.21 | -54.9357 | -44.8243 | -38.6943 | -33.1593 |
| 0.08987 | 1476.95 | 1505.22 | 1528.16 | 1544.03 | -54.9246 | -44.8273 | -38.7046 | -33.1760 |
| 0.09843 | 1477.95 | 1506.12 | 1529.00 | 1544.80 | -54.9141 | -44.8300 | -38.7142 | -33.1916 |

Glycyl-L-threonine + 0.100 mol·kg<sup>-1</sup> [OMim] [Br]

|         |         |         |         |         |          |          |          |          |
|---------|---------|---------|---------|---------|----------|----------|----------|----------|
| 0.00000 | 1480.26 | 1508.28 | 1531.00 | 1546.59 |          |          |          |          |
| 0.01085 | 1481.51 | 1509.42 | 1532.06 | 1547.57 | -51.4927 | -42.6250 | -36.8201 | -31.5577 |
| 0.02037 | 1482.60 | 1510.42 | 1533.00 | 1548.42 | -51.4859 | -42.6308 | -36.8331 | -31.5770 |
| 0.03116 | 1483.84 | 1511.55 | 1534.05 | 1549.39 | -51.4781 | -42.6372 | -36.8476 | -31.5987 |
| 0.04025 | 1484.89 | 1512.51 | 1534.94 | 1550.21 | -51.4713 | -42.6424 | -36.8596 | -31.6169 |
| 0.04938 | 1485.94 | 1513.46 | 1535.84 | 1551.03 | -51.4644 | -42.6475 | -36.8716 | -31.6349 |
| 0.06013 | 1487.17 | 1514.59 | 1536.89 | 1552.00 | -51.4561 | -42.6533 | -36.8856 | -31.6560 |
| 0.06908 | 1488.20 | 1515.53 | 1537.77 | 1552.81 | -51.4491 | -42.6581 | -36.8970 | -31.6735 |
| 0.08143 | 1489.62 | 1516.83 | 1538.98 | 1553.92 | -51.4393 | -42.6644 | -36.9126 | -31.6973 |
| 0.09071 | 1490.69 | 1517.80 | 1539.89 | 1554.75 | -51.4317 | -42.6690 | -36.9242 | -31.7151 |
| 0.10726 | 1492.59 | 1519.54 | 1541.51 | 1556.24 | -51.4180 | -42.6769 | -36.9445 | -31.7464 |

Glycyl-L- threonine + 0.200 mol·kg<sup>-1</sup> [OMim] [Br]

|         |         |         |         |         |          |          |          |          |
|---------|---------|---------|---------|---------|----------|----------|----------|----------|
| 0.00000 | 1493.99 | 1520.78 | 1542.65 | 1557.24 |          |          |          |          |
| 0.01034 | 1495.18 | 1521.87 | 1543.65 | 1558.17 | -48.7530 | -40.5543 | -34.5641 | -30.1459 |
| 0.02061 | 1496.36 | 1522.94 | 1544.65 | 1559.09 | -48.7483 | -40.5620 | -34.5800 | -30.1674 |
| 0.02978 | 1497.41 | 1523.91 | 1545.54 | 1559.92 | -48.7440 | -40.5688 | -34.5939 | -30.1864 |

|         |         |         |         |         |          |          |          |          |
|---------|---------|---------|---------|---------|----------|----------|----------|----------|
| 0.04034 | 1498.63 | 1525.02 | 1546.56 | 1560.87 | -48.7389 | -40.5764 | -34.6099 | -30.2082 |
| 0.04937 | 1499.67 | 1525.96 | 1547.44 | 1561.68 | -48.7344 | -40.5828 | -34.6233 | -30.2266 |
| 0.06039 | 1500.93 | 1527.12 | 1548.51 | 1562.68 | -48.7287 | -40.5905 | -34.6396 | -30.2490 |
| 0.07142 | 1502.20 | 1528.28 | 1549.58 | 1563.67 | -48.7229 | -40.5980 | -34.6557 | -30.2712 |
| 0.08072 | 1503.27 | 1529.26 | 1550.48 | 1564.50 | -48.7178 | -40.6041 | -34.6691 | -30.2897 |
| 0.08976 | 1504.31 | 1530.20 | 1551.36 | 1565.32 | -48.7128 | -40.6099 | -34.6821 | -30.3076 |
| 0.09971 | 1505.46 | 1531.25 | 1552.32 | 1566.21 | -48.7071 | -40.6162 | -34.6961 | -30.3272 |

Glycyl-L- threonine + 0.300 mol·kg<sup>-1</sup> [OMim] [Br]

|         |         |         |         |         |          |          |          |          |
|---------|---------|---------|---------|---------|----------|----------|----------|----------|
| 0.00000 | 1507.72 | 1533.28 | 1554.30 | 1567.89 |          |          |          |          |
| 0.01135 | 1509.03 | 1534.47 | 1555.41 | 1568.91 | -46.1546 | -38.5808 | -33.4675 | -28.7923 |
| 0.01989 | 1510.01 | 1535.37 | 1556.25 | 1569.68 | -46.1527 | -38.5884 | -33.4808 | -28.8107 |
| 0.02976 | 1511.14 | 1536.40 | 1557.22 | 1570.57 | -46.1504 | -38.5971 | -33.4959 | -28.8317 |
| 0.04015 | 1512.34 | 1537.50 | 1558.23 | 1571.50 | -46.1478 | -38.6060 | -33.5118 | -28.8538 |
| 0.05031 | 1513.51 | 1538.56 | 1559.23 | 1572.42 | -46.1451 | -38.6146 | -33.5270 | -28.8751 |
| 0.06173 | 1514.82 | 1539.76 | 1560.35 | 1573.45 | -46.1419 | -38.6241 | -33.5440 | -28.8989 |
| 0.07124 | 1515.91 | 1540.76 | 1561.28 | 1574.30 | -46.1391 | -38.6318 | -33.5581 | -28.9186 |
| 0.08019 | 1516.94 | 1541.70 | 1562.16 | 1575.11 | -46.1363 | -38.6390 | -33.5711 | -28.9370 |
| 0.09375 | 1518.50 | 1543.12 | 1563.49 | 1576.33 | -46.1319 | -38.6496 | -33.5906 | -28.9646 |
| 0.09921 | 1519.13 | 1543.70 | 1564.02 | 1576.82 | -46.1301 | -38.6538 | -33.5984 | -28.9757 |

Glycyl-L-threonin + 0.400 mol·kg<sup>-1</sup> [OMim] [Br]

|         |         |         |         |         |  |  |  |  |
|---------|---------|---------|---------|---------|--|--|--|--|
| 0.00000 | 1521.45 | 1545.78 | 1565.95 | 1578.54 |  |  |  |  |
|---------|---------|---------|---------|---------|--|--|--|--|

|         |         |         |         |         |          |          |          |          |
|---------|---------|---------|---------|---------|----------|----------|----------|----------|
| 0.01147 | 1522.77 | 1546.98 | 1567.07 | 1579.57 | -43.6905 | -36.6181 | -31.8976 | -27.4896 |
| 0.02058 | 1523.82 | 1547.94 | 1567.97 | 1580.39 | -43.6905 | -36.6275 | -31.9125 | -27.5096 |
| 0.02935 | 1524.83 | 1548.86 | 1568.83 | 1581.18 | -43.6903 | -36.6364 | -31.9268 | -27.5288 |
| 0.03981 | 1526.03 | 1549.96 | 1569.85 | 1582.12 | -43.6899 | -36.6468 | -31.9436 | -27.5515 |
| 0.05125 | 1527.34 | 1551.16 | 1570.97 | 1583.15 | -43.6893 | -36.6581 | -31.9617 | -27.5762 |
| 0.06084 | 1528.45 | 1552.17 | 1571.91 | 1584.02 | -43.6887 | -36.6673 | -31.9768 | -27.5967 |
| 0.06921 | 1529.41 | 1553.05 | 1572.73 | 1584.77 | -43.6880 | -36.6753 | -31.9899 | -27.6145 |
| 0.08037 | 1530.69 | 1554.22 | 1573.83 | 1585.77 | -43.6870 | -36.6858 | -32.0071 | -27.6380 |
| 0.09034 | 1531.84 | 1555.27 | 1574.80 | 1586.67 | -43.6859 | -36.6950 | -32.0224 | -27.6589 |
| 0.10275 | 1533.27 | 1556.57 | 1576.02 | 1587.79 | -43.6844 | -36.7062 | -32.0411 | -27.6847 |

<sup>a</sup> $m_A$  is the molality of dipeptides in aqueous solutions of 1-octyl-3-methylimidazolium bromide. represents reference (53) from where the speed of sound values has been taken. Standard uncertainties  $u$  obtained are  $u(u) = 0.05 \text{ m}\cdot\text{s}^{-1}$ ;  $u(m) = 2 \times 10^{-5} \text{ mol}\cdot\text{kg}^{-1}$ ;  $u(T) = 0.001 \text{ K}$ , and  $u(p) = 0.01 \text{ MPa}$ .

**Table S6** Cartesian coordinates of DFT-optimised [OMIm][Br]-L-Threonine complex at B3LYP/6-311G(d,p) level of theory.

|   |          |         |          |
|---|----------|---------|----------|
| H | -0.80891 | 2.85909 | -0.69533 |
| C | -0.70018 | 3.28223 | 0.29184  |
| N | -1.32436 | 2.82552 | 1.37139  |
| C | -0.93257 | 3.62534 | 2.43210  |
| C | -0.07964 | 4.54590 | 1.95568  |
| N | 0.05981  | 4.32357 | 0.59895  |
| H | -1.27780 | 3.48818 | 3.44537  |
| H | 0.43113  | 5.33287 | 2.48919  |
| C | -2.23667 | 1.69094 | 1.40748  |

|    |          |          |          |
|----|----------|----------|----------|
| H  | -2.70732 | 1.57957  | 0.42486  |
| H  | -3.03573 | 1.89847  | 2.12880  |
| C  | -1.46993 | 0.43131  | 1.80009  |
| H  | -0.62309 | 0.30026  | 1.11896  |
| H  | -1.04541 | 0.55513  | 2.80372  |
| C  | -2.38003 | -0.79718 | 1.77247  |
| H  | -3.21267 | -0.63746 | 2.46890  |
| H  | -2.82326 | -0.91134 | 0.77587  |
| C  | -1.67023 | -2.09649 | 2.16295  |
| H  | -1.22458 | -1.99030 | 3.15938  |
| H  | -2.42788 | -2.88643 | 2.23786  |
| C  | -0.59629 | -2.52557 | 1.15886  |
| H  | -1.01880 | -2.53377 | 0.14704  |
| H  | 0.22096  | -1.79828 | 1.16793  |
| C  | -0.04688 | -3.91469 | 1.49412  |
| H  | 0.41293  | -3.90197 | 2.48978  |
| H  | -0.87983 | -4.62725 | 1.53946  |
| C  | 0.96315  | -4.42908 | 0.46587  |
| H  | 0.51516  | -4.42170 | -0.53457 |
| H  | 1.19586  | -5.47454 | 0.70108  |
| C  | 2.26313  | -3.64042 | 0.44535  |
| H  | 2.97293  | -4.10420 | -0.24714 |
| H  | 2.10345  | -2.61116 | 0.11443  |
| H  | 2.72420  | -3.61707 | 1.43774  |
| Br | -0.16976 | 3.45949  | -3.62349 |
| C  | 0.89044  | 5.06259  | -0.33678 |
| H  | 1.55587  | 4.37493  | -0.86400 |
| H  | 1.50586  | 5.79047  | 0.20159  |
| H  | 0.25415  | 5.60138  | -1.04305 |
| C  | 2.95593  | -0.02853 | -1.76230 |
| H  | 3.52530  | 0.38496  | -0.92234 |
| H  | 3.23055  | -1.08126 | -1.87423 |

|   |          |          |          |
|---|----------|----------|----------|
| H | 3.27738  | 0.51626  | -2.65693 |
| C | 1.45810  | 0.15133  | -1.52753 |
| H | 1.17813  | -0.39103 | -0.61830 |
| C | 0.60939  | -0.35156 | -2.71977 |
| H | 0.83652  | 0.25809  | -3.60118 |
| C | -0.89620 | -0.19711 | -2.44449 |
| O | -1.64039 | -0.65358 | -3.48301 |
| H | -2.54748 | -0.34435 | -3.28396 |
| O | -1.44584 | 0.22288  | -1.43744 |
| N | 0.88712  | -1.77811 | -3.05119 |
| H | 0.55118  | -2.36375 | -2.28765 |
| H | 0.28970  | -2.00741 | -3.85148 |
| O | 1.25616  | 1.54136  | -1.24369 |
| H | 1.09727  | 2.01345  | -2.09924 |

**Table S7** Cartesian coordinates of DFT-optimised [OMIm][Br]-Glycyl-L-Threonine complex at B3LYP/6-311G(d,p) level of theory.

| <b>Atom</b> | <b>X (Å)</b> | <b>Y (Å)</b> | <b>Z (Å)</b> |
|-------------|--------------|--------------|--------------|
| H           | 0.23745      | -2.67646     | -0.35479     |
| C           | 0.98555      | -3.31487     | 0.10101      |
| N           | 2.20025      | -2.90133     | 0.45912      |
| C           | 2.86213      | -3.94393     | 1.07130      |
| C           | 2.01650      | -5.00738     | 1.06657      |
| N           | 0.85114      | -4.58998     | 0.45587      |
| H           | 3.86748      | -3.83613     | 1.44689      |
| H           | 2.13599      | -6.01434     | 1.43394      |
| C           | 2.66897      | -1.51852     | 0.31191      |
| H           | 2.35310      | -1.17647     | -0.67604     |
| H           | 3.76037      | -1.54248     | 0.33752      |
| C           | 2.08390      | -0.62136     | 1.39800      |

|    |          |          |          |
|----|----------|----------|----------|
| H  | 1.00145  | -0.78986 | 1.42410  |
| H  | 2.48580  | -0.91586 | 2.37527  |
| C  | 2.35594  | 0.85638  | 1.12398  |
| H  | 3.43066  | 1.06823  | 1.20797  |
| H  | 2.06642  | 1.08658  | 0.09022  |
| C  | 1.56489  | 1.76490  | 2.06351  |
| H  | 0.50092  | 1.51561  | 1.97230  |
| H  | 1.83861  | 1.55250  | 3.10669  |
| C  | 1.76991  | 3.25559  | 1.78299  |
| H  | 2.81234  | 3.51083  | 2.01360  |
| H  | 1.64111  | 3.44252  | 0.70767  |
| C  | 0.81877  | 4.17147  | 2.57544  |
| H  | 0.54957  | 3.68123  | 3.52196  |
| H  | 1.34332  | 5.09490  | 2.84967  |
| C  | -0.46134 | 4.56513  | 1.82503  |
| H  | -0.18246 | 5.15662  | 0.94200  |
| H  | -1.05073 | 5.23180  | 2.46801  |
| C  | -1.33964 | 3.39499  | 1.37863  |
| H  | -2.27151 | 3.75819  | 0.93160  |
| H  | -0.83627 | 2.77828  | 0.62711  |
| H  | -1.60355 | 2.74981  | 2.22580  |
| Br | -3.47328 | -3.05031 | -1.39930 |
| C  | -0.34539 | -5.39832 | 0.24722  |
| H  | -0.10189 | -6.24698 | -0.39343 |
| H  | -1.10466 | -4.77755 | -0.23073 |
| H  | -0.71253 | -5.75167 | 1.21188  |
| N  | -1.45415 | -1.81689 | 1.43746  |
| H  | -1.97307 | -2.49928 | 0.88405  |
| H  | -1.77107 | -1.92820 | 2.39667  |
| C  | -1.82302 | -0.48692 | 0.98319  |
| H  | -2.90688 | -0.29562 | 0.97673  |
| H  | -1.37649 | 0.25580  | 1.65643  |

|   |          |          |          |
|---|----------|----------|----------|
| C | -1.27897 | -0.19998 | -0.40827 |
| N | -1.89263 | 0.80629  | -1.06356 |
| H | -2.69812 | 1.25362  | -0.65209 |
| C | -1.51331 | 1.18849  | -2.40958 |
| H | -1.98866 | 2.15848  | -2.59321 |
| C | -0.00681 | 1.46342  | -2.43602 |
| O | -0.32730 | -0.79904 | -0.91461 |
| C | -2.04940 | 0.19102  | -3.47050 |
| H | -1.42872 | -0.71316 | -3.44800 |
| O | -3.39291 | -0.13091 | -3.16319 |
| H | -3.38661 | -0.84049 | -2.49501 |
| C | -2.04477 | 0.79727  | -4.86623 |
| H | -1.04169 | 1.10493  | -5.16843 |
| H | -2.70407 | 1.67251  | -4.89119 |
| H | -2.41885 | 0.06368  | -5.58601 |
| O | 0.63970  | 0.86330  | -3.43523 |
| H | 1.57540  | 1.12728  | -3.38574 |
| O | 0.54313  | 2.20269  | -1.64816 |
